# Supplementary material for: Competence in Sports Pharmacy among Pharmacy Students in Norway
Source: MDPI journal article supplement (doi:10.3390/pharmacy12010003), 2023-12-23
Supplement: s1 [file s1]

## Hva er status på kompetansen innen sportsfarmasi hos studenter i farmasiutdanningen i Norge? kopi

### Hva er status på kompetansen innen sportsfarmasi hos studenter i farmasiutdanningen i Norge?

Hei!

Vi er en gruppe på 6 farmasistudenter som nå er i gang med å skrive vår bacheloroppgave. I denne sammenheng sender vi deg nå en kort spørreundersøkelse. Målet med studien vår er å undersøke status på kompetansen innen sportsfarmasi hos studenter i farmasiutdanningen i Norge.

Spørreundersøkelsen består av 3 deler, som henholdsvis handler om bakgrunnsinformasjon, kunnskap om sportsfarmasi og alternativer for å forbedre kunnskapen rundt sportsfarmasi. Alle svar registreres helt anonymt, så kom gjerne med ærlige tilbakemeldinger. Undersøkelsen skal svares fra egen erfaring og kunnskap, uten hjelpemidler.

Det tar ca 5-8 minutter å fullføre spørreundersøkelsen, og din tilbakemelding vil være til stor hjelp for oss i vårt arbeid. Spørreundersøkelsen stenges 26.april klokken 12:00.

På forhånd takk!

Med vennlig hilsen,

Natalia Dabrowska, Lone Malmberg, Hadis Nejati, Cecilie Bach Volle, Maren Røssing Witzø og Hatice Yaman

### DEL 1: Bakgrunnsinformasjon om deltager

#### 1. Kjønn

Mann

Kvinne

Annet

Ønsker ikke svare

#### 2. Alder (år)

18-21

22-25

26-29

30-33

34-37

>38

#### 3. Utdanningsinstitusjon

Universitet i Tromsø

OsloMet - storbyuniversitet

Norges teknisk-naturvitenskapelig universitet

Universitet i Bergen

Nord universitetet

Universitet i Oslo

#### 4. Nåværende årstrinn i utdanningen

- 1.
- 2.
- 3.
- 4.
- 5.

#### 5. Hvor ofte følger du med på idrett/sport?

- Ofte
- I blant
- Aldri
- Ønsker ikke å svare

#### 6. Har du drevet med/driver med noe form for idrett/sport?

- Ja
- Nei
- Ønsker ikke å svare

#### 7. Hvor lenge drev du/har du drevet med idrett/sport?

*Dette elementet vises kun dersom alternativet «Ja» er valgt i spørsmålet «6. Har du drevet med/driver med noe form for idrett/sport?»*

- <1 år
- 1-3 år
- 4-6 år
- 7-9 år
- 10-12 år
- 13-15 år
- >15 år
- Ønsker ikke å svare

#### 8. Hva er det høyeste nivået du har drevet med idrett/sport på?

*Dette elementet vises kun dersom alternativet «Ja» er valgt i spørsmålet «6. Har du drevet med/driver med noe form for idrett/sport?»*

- Internasjonalt nivå
- Nasjonalt nivå
- Regionalt nivå
- Fritid sport/idrett
- Ønsker ikke å svare

#### DEL 2: Hva kan du innen temaet?

I denne delen er det samlet en del kunnskapsspørsmål innen temaet sportsfarmasi. Vi vil vite hva du kan, derfor skal delen gjennomføres uten hjelpemidler!

Svaralternativ varierer mellom ja/nei, skala fra 1-5 og flervalgsspørsmål.

#### 9. Vet du hva begrepet sportsfarmasi innebærer?

- Ja

Nei

Ønsker ikke svare

**10. Hvordan ville du beskrevet din egen kunnskap om sportsfarmasi?**

5 - Svært god

4 - God

3 - Middels god

2 - Manglende

1- Ingen

Ønsker ikke å svare

**11. Hvordan vil du beskrive din kunnskap innen temaet doping?**

5 - Svært god

4 - God

3 - Middels god

2 - Manglende

1- Ingen

Ønsker ikke å svare

**12. Hvor god kjennskap har du til WADA?**

5 - Svært god

4 - God

3 - Middels god

2 - Manglende

1- Ingen

Ønsker ikke å svare

**13. Hvor god kjennskap har du til medisinske konsekvenser som doping kan føre til?**

5 - Svært god

4 - God

3 - Middels god

2 - Manglende

1- Ingen

Ønsker ikke å svare

**14. Vet du hvordan du kan sjekke om et stoff er forbudt i idretten?**

Ja

Nei

Ønsker ikke å svare

**15. Hvis ja; hvordan ville du selv sjekket dette?**

*Dette elementet vises kun dersom alternativet «Ja» er valgt i spørsmålet «14. Vet du hvordan du kan sjekke om et stoff er forbudt i idretten? »*

**16. Har du hørt om noen tidligere saker om doping i idretten? (f.eks nyhetsartikler)**

Ja

Nei

Ønsker ikke å svare

**17. Har du kjennskap til behandling av akutte idrettsskader?**

Ja

Nei

Ønsker ikke å svare

**18. Hvor komfortabel ville du følt deg med å gi råd til en trener eller idrettsutøver ved idrettsskader?**

5 - Svært komfortabel

4 - Komfortabel

3 - Verken eller

2 - Ukomfortabel

1 - Svært ukomfortabel

Ønsker ikke å svare

**19. I hvilke/hvilket av kroppens organsystemer/deler tror du de fleste idrettsskader oppstår?**

Det kardiovaskulære systemet

Nervesystemet

Respirasjonssystemet

Muskel- og skjelettsystemet

Vev- og bløtdelsorganer

Fordøyelsessystemet

Ekskresjonssystemet

Det endokrine systemet

Ønsker ikke å svare

**20. Synes du det er viktig at farmasøyter har kunnskap innen sportsmedisin?**

Ja

Nei

Ønsker ikke å svare

**21. Hvilke profesjoner/yrker tror du har mest kompetanse innenfor sportsmedisin NÅ?**

Farmasøyter

Fastleger

Fysioterapeuter

Idrettsutøvere

Kiropraktor

Sportsleger/lagleger

Sykepleiere

Tannleger  
Trenere  
Osteopater  
Ønsker ikke å svare

**22. Var det noen profesjoner/yrker du savnet i forrige spørsmål?**

**23. Hvilke jobber kan du se for deg at farmasøyt kunne hatt som sportsfarmasøyt?**

Arbeide i utdanning/undervisning på høyskole eller universitet  
Jobbe for nasjonale eller internasjonale dopingbyrå  
Farmasøytiske selskaper som utvikler medisiner og kosttilskudd for idrettsutøvere  
Jobbe i idrettsforbund, -lag eller -foreninger  
Jobbe i apotek  
Ønsker ikke å svare

**24. Har du noen andre forslag til relevante jobber enn alternativ nevnt ovenfor?**

**DEL 3: Hvordan kan vi forbedre kunnskapen innen sportsfarmasi?**

Formålet i denne delen er å utforske hvordan man kan tilegne seg kunnskap innen sportsfarmasi.

**25. Har du deltatt i undervisning om doping eller sportsfarmasi tidligere?**

Ja  
Nei  
Ønsker ikke å svare

**26. Hva slags undervisning om doping eller sportsfarmasi har du deltatt i tidligere?**

*Dette elementet vises kun dersom alternativet «Ja» er valgt i spørsmålet «25. Har du deltatt i undervisning om doping eller sportsfarmasi tidligere?»*

**27. Hvilket av disse alternativene tror du at ville vært best for å tilegne seg kunnskap om sportsfarmasi?**

En videreutdanning (mastegrad/phd)  
Et obligatorisk emne på farmasiutdanningen  
Et valgfritt emne på farmasiutdanningen  
Et fokustema innad i et eksisterende fag  
En forelesning/et kurs om det  
Nettkurs, E-læring, selv-læringskurs eller webinar  
Trenger ikke mer opplæring innen det  
Ønsker ikke å svare

**28. Er det noen andre tiltak du ville foreslått for å øke kunnskapen om sportsfarmasi/doping?**

**29. Ville du selv ha ønsket å delta på opplæring om sportsfarmasi?**

Ja  
Nei  
Ønsker ikke å svare

**30. Er det noe annet du vil legge til?**

## **What is the status of competence in sports pharmacy among students in pharmacy education in Norway?**

Hello!

We are a group of 6 pharmacy students who are now writing our bachelor thesis. In this regard, we are now sending you a short survey. The aim of our study is to investigate the status of competence in sports pharmacy among students in pharmacy education in Norway.

The survey consists of 3 parts, which respectively deal with background information and knowledge on sports pharmacy and alternatives to improve knowledge around sports pharmacy. All responses are recorded completely anonymous, so feel free to give honest feedback. The survey must be answered from your own experience and knowledge, without aids.

It takes about 5-8 minutes to complete the survey, and your feedback will be of great help us in our work. The survey closes on 26 April at 12:00.

Thanks in advance!

Sincerely,

Natalia Dabrowska, Lone Malmberg, Hadis Nejati, Cecilie Bach Volle, Maren Røssing Witzø and Hatice Yaman

### **PART 1: Background information about the participant**

#### **1. Gender**

Man

Woman

Other

Don't want to answer

#### **2. Age (years)**

18-21

22-25

26-29

30-33

34-37

38 and above

#### **3. Educational institution**

University of Tromsø

OsloMet – Oslo Metropolitan University

The Norwegian University of Science and Technology

University of Bergen

North University

University of Oslo

**4. Current year in the education**

1.

2.

3.

4.

5.

**5. How often do you do sport/sports?**

Frequent

Amongst you

Never

Don't want to answer

**6. Have you been involved in/are you involved in any kind of sport/sports?**

Yes

No

Don't want to answer

**7. How long did you/have you been doing sports/sport?**

This element is only displayed if the alternative «Yes» is selected in the question «6. Have you been/are you involved in any kind of sports?»

less than 1 year

1-3 years

4-6 years

7-9 years

10-12 years

13-15 years

more than 15 years

Don't want to answer

**8. What is the highest level you have played sports at?**



This element is only displayed if the alternative «Yes» is selected in the question «6. Have you been/are you involved in any kind of sports?»

International level

National level

Regional level

Leisure sports/sports

Don't want to answer

## **PART 2: What can you do within the theme?**

In this part, a number of knowledge questions within the theme of sports pharmacy have been collected. We want to know what you can, therefore this part must be answered by you without aids!

Answer alternatives vary between yes/no, scale from 1-5 and multiple choice questions.

### **9. Do you know what the term sports pharmacy entails?**

Yes

No

Don't want to answer

### **10. How would you describe your own knowledge of sports pharmacy?**

5 - Very good

4 - Good

3 - Moderately good

2 - Missing

1- None

Don't want to answer

### **11. How would you describe your knowledge on the subject of doping?**

5 - Very good

4 - Good

3 - Moderately good

2 - Missing

1- None

Don't want to answer

### **12. How well do you know WADA?**

5 - Very good

4 - Good

3 - Moderately good

2 - Missing

1- None

Don't want to answer

**13. How well do you know the medical consequences that doping can lead to?**

5 - Very good

4 - Good

3 - Moderately good

2 - Missing

1- None

Don't want to answer

**14. Do you know how you can check if a substance is prohibited in sport?**

Yes

No

Don't want to answer

**15. If yes; how would you check this yourself?**

This element is only displayed if the alternative «Yes» is selected in the question «14. Do you know how you can check if a substance is banned in sports? »

**16. Have you heard of any previous cases of doping in sports? (e.g. news articles)**

Yes

No

Don't want to answer

**17. Do you know how to treat acute sports injuries?**

Yes

No

Don't want to answer

**18. How comfortable would you feel giving advice to a coach or athlete for sports injuries?**

5 - Very comfortable

4 - Comfortable

3 - Neither or

2 - Uncomfortable

1 - Very uncomfortable

Don't want to answer

**19. In which of the body's organ systems/parts do you think most sports injuries occur occurs?**

The cardiovascular system

The nervous system

The respiratory system

Musculoskeletal system

Tissue and soft tissue organs

The digestive system

The excretory system

The endocrine system

Don't want to answer

**20. Do you think it is important that pharmacists have knowledge in sports medicine?**

Yes

No

Don't want to answer

**21. Which professions/occupations do you think have the most expertise in sports medicine?**

Pharmacists

GPs

Physiotherapists

Athletes

Chiropractor

Sports doctors/team doctors

Nurses

Dentists

Trainers

Osteopaths

Don't want to answer

**22. Were there any professions you missed in the previous question? -----**

**23. What jobs can you imagine a pharmacist could have as a sports pharmacist?**

Work in education/teaching at a college or university

Work for national or international doping agencies

Pharmaceutical companies that develop drugs and nutritional supplements for athletes

Work in sports federations, teams or associations

Work in a pharmacy

Don't want to answer

**24. Do you have any other suggestions for relevant jobs than the alternative mentioned above? -----**

### **PART 3: How can we improve knowledge in sports pharmacy?**

The purpose of this part is to explore how to acquire knowledge in sports pharmacy.

**25. Have you attended classes on doping or sports pharmacy before?**

Yes

No

Don't want to answer

**26. What kind of training on doping or sports pharmacy have you attended in the past?**

This element is only displayed if the alternative «Yes» is selected in the question «25. Have you attended classes on doping or sports pharmacy earlier? »

**27. Which of these alternatives do you think would be best to acquire knowledge of sports pharmacy?**

A further education (master's degree/PhD)

A compulsory subject in pharmacy education

An optional subject in the pharmacy education

A focus theme within an existing subject

A lecture/course about it

Online course, E-learning, self-learning course or webinar

No more training is needed in that area

Don't want to answer

**28. Are there any other measures you would suggest to increase knowledge about sports pharmacy/doping?**

**29. Would you have wished to participate in training on sports pharmacy yourself?**

Yes

No

Don't want to answer

**30. Is there anything else you would like to add? -----**
